# Supplementary material for: Fe2(SO4)3·xH2O on silica: an efficient and low-cost catalyst for the direct nucleophilic substitution of alcohols in solvent-free conditions
Source: Royal Society of Chemistry journal article supplement (doi:10.1039/c3ra45772a), 2013-11-11

**Fe<sub>2</sub>(SO<sub>4</sub>)<sub>3</sub>·xH<sub>2</sub>O on silica: an efficient and low-cost reaction  
system for the direct nucleophilic substitution of alcohols at  
solventless conditions**

Lingjun Li, Anlian Zhu\*, Yuqin Zhang, Xincui Fan, Guisheng Zhang

School of Chemistry and Chemical Engineering, Key Laboratory of Green Chemical  
Media and Reactions, Ministry of Education, Henan Normal University, Xinxiang,

Henan 453007, P. R. China

[anlian\\_cn@aliyun.com](mailto:anlian_cn@aliyun.com).

|                                                                  |        |
|------------------------------------------------------------------|--------|
| 1. Characterization of compounds 3a-n -----                      | S2-S7  |
| 2. References-----                                               | S7- S8 |
| 3. Copies of <sup>1</sup> H NMR spectrum for compound 3j -----   | S9     |
| 4. Copies of <sup>13</sup> C NMR spectrum for compound 3j -----  | S10    |
| 5. Copies of <sup>1</sup> H NMR spectrum for compound 3k-----    | S11    |
| 6. Copies of <sup>13</sup> C NMR spectrum for compound 3k-----   | S12    |
| 7. Copies of <sup>1</sup> H NMR spectrum for compound 3l-----    | S13    |
| 8. Copies of <sup>13</sup> C NMR spectrum for compound 3l-----   | S14    |
| 9. Copies of <sup>1</sup> H NMR spectrum for compound 3m-----    | S15    |
| 10. Copies of <sup>13</sup> C NMR spectrum for compound 3m ----- | S16    |
| 11. Copies of <sup>1</sup> H NMR spectrum for compound 3o -----  | S17    |
| 10. Copies of <sup>13</sup> C NMR spectrum for compound 3o ----- | S18    |

## 1 Characterization of compounds 3a-n

### 2-Benzhydryl-1-phenyl-butane-1,3-dione (3a).

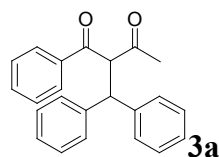

The physical data shown below were comparable to those reported in literature.<sup>[1]</sup>

White solid, m.p. 155-156 °C, reported m.p. 156-157 °C; <sup>1</sup>H NMR (400 MHz, CDCl<sub>3</sub>)

δ: 7.96 (d, *J* = 8 Hz, 2 H), 7.77-7.03 (m, 13 H), 5.62 (d, *J* = 12 Hz, 1H), 5.10 (d, *J* =

12 Hz, 1H), 2.05 (s, 3 H). <sup>13</sup>C NMR (100 MHz, CDCl<sub>3</sub>) δ: 202.3, 193.1, 140.6, 140.2,

136.1, 132.5, 128.2, 128.0, 127.9, 127.3, 126.9, 126.6, 125.9, 68.2, 50.1, 27.1.

### 3-Benzhydryl-pentane-2,4-dione (3b).

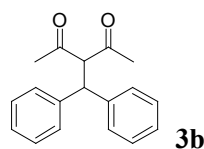

The physical data shown below were comparable to those reported in literature.<sup>[2]</sup>

White solid, m.p. 114-115 °C, reported m.p. 112-114 °C; <sup>1</sup>H NMR (400 MHz, CDCl<sub>3</sub>)

δ: 7.48-7.03 (m, 10 H), 4.80 (d, *J* = 12 Hz, 1H), 7.73 (d, *J* = 12 Hz, 1H), 2.05 (s, 6H).

<sup>13</sup>C NMR (100 MHz, CDCl<sub>3</sub>) δ: 203.0, 141.3, 129.1, 127.9, 126.9, 74.1, 51.5, 30.1.

### 2-Benzhydryl-3-oxo-butyrac acid ethyl ester (3c)

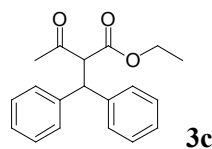

The physical data shown below were comparable to those reported in literature.<sup>[3]</sup>

White solid, m.p. 86-87 °C, reported m.p. 84-86 °C; <sup>1</sup>H NMR (400 MHz, CDCl<sub>3</sub>) δ:

7.30-7.15 (m, 10 H), 4.76 (d, *J* = 12 Hz, 1 H), 4.56 (d, *J* = 12 Hz, 1 H), 4.01 (q, *J* = 7

Hz, 2 H), 2.13 (s, 3 H), 1.05 (t, *J* = 7 Hz, 3 H). <sup>13</sup>C NMR (100 MHz, CDCl<sub>3</sub>) δ: 202.1,

167.7, 141.3, 141.0, 129.0, 128.8, 128.0, 127.8, 127.1, 126.8, 65.3, 61.6, 51.1, 32.8,  
13.6.

***N*-(4-nitrophenyl)-1,1'-diphenyl-methyamine (3d)**

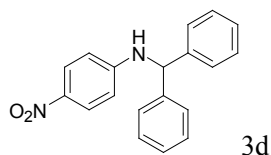

The physical data shown below were comparable to those reported in literature.<sup>[4]</sup>

Yellow solid, m.p. 194-195°C, reported m.p. 195°C; <sup>1</sup>H NMR (400 MHz, CDCl<sub>3</sub>) δ: 8.06-8.02 (m, 2H), 7.41-7.30 (m, 10H), 6.53-6.50 (m, 2H), 5.68 (d, *J* = 4 Hz, 1H); <sup>13</sup>C NMR (CDCl<sub>3</sub>, 100 MHz) δ: 153.1, 141.2, 139.3, 129.5, 128.7, 127.6, 126.7, 113.1, 63.0.

***N*-benzhydryl-*p*-toluenesulfonamide (3e)**

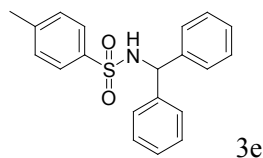

The physical data shown below were comparable to those reported in literature.<sup>[4]</sup>

White solid, m.p. 156-158 °C, reported m.p.157°C; <sup>1</sup>H NMR (400 MHz, CDCl<sub>3</sub>) δ: 7.55 (d, *J* = 8.2 Hz, 2H), 7.23-7.05 (m, 12H), 5.59 (d, *J* = 7.2 Hz, 1H), 5.18 (d, *J* = 7.2 Hz, 1H), 2.49 (s, 3H); <sup>13</sup>C NMR (100 MHz, CDCl<sub>3</sub>) δ: 143.0, 142.8, 139.9, 133.1, 131.1, 130.6, 130.2, 130.0, 59.8, 23.3.

***N*-benzhydrylbenzamide (3f)**

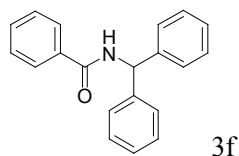

The physical data shown below were comparable to those reported in literature.<sup>[5]</sup>

White solid, m.p. 168-170 °C, reported m.p. 170 °C; <sup>1</sup>H NMR (400 MHz, CDCl<sub>3</sub>) δ: 7.88-7.42 (m, 5H), 7.41-7.33 (m, 10H), 6.71 (d, *J* = 7.8 Hz, 1H), 6.47 (d, *J* = 7.8 Hz, 1H), <sup>13</sup>C NMR (CDCl<sub>3</sub>, 100 MHz) δ: 166.5, 141.1, 133.6, 131.2, 128.0, 127.7, 127.5, 127.0, 126.8, 56.1.

**N-Benzhydryl-N'-(2,4-dinitro-phenyl)-hydrazine (3g)**

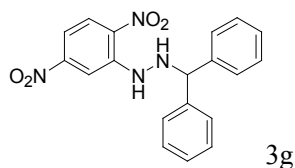

The physical data shown below were comparable to those reported in literature. <sup>[4]</sup>

White solid, m.p. 164-165 °C, reported m.p. 165 °C; <sup>1</sup>H NMR (400 MHz, CDCl<sub>3</sub>) δ: 9.25 (s, 1H), 9.01 (d, *J* = 2 Hz, 1H), 8.31 (dd, *J*<sub>1</sub> = 9 Hz, *J*<sub>2</sub> = 1 Hz), 7.97 (d, *J* = 9 Hz, 1H), 7.46-7.32 (m, 10 H), 5.23 (d, *J* = 5.2 Hz, 1H), 4.50 (d, *J* = 6 Hz, 1H). <sup>13</sup>C NMR (100 MHz, CDCl<sub>3</sub>) δ: 152.9, 140.2, 138.5, 134.1, 131.9, 130.2, 129.1, 128.6, 126.5, 121.2, 66.3.

**2-[Bis-(4-chloro-phenyl)-methyl]-1-phenyl-butane-1,3-dione (3h).**

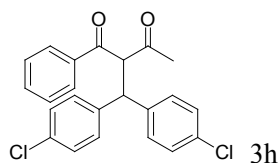

The physical data shown below were comparable to those reported in literature. <sup>[1]</sup>

White solid, m.p. 166-168 °C, reported m.p. 167-168 °C; <sup>1</sup>H NMR (400 MHz, CDCl<sub>3</sub>) δ: 8.02 - 7.11 (m, 13 H), 5.55 (d, *J* = 12 Hz, 1H), 5.11 (d, *J* = 12 Hz, 1H), 2.08 (s, 3 H). <sup>13</sup>C NMR (100 MHz, CDCl<sub>3</sub>) δ: 201.1, 192.9, 139.1, 138.5, 135.4, 133.5, 132.5, 131.8, 128.2, 128.4, 128.3, 128.1, 127.9, 127.6, 67.8, 49.3, 26.8.

**[Bis-(4-chloro-phenyl)-methyl]-(4-nitro-phenyl)-amine (3i).**

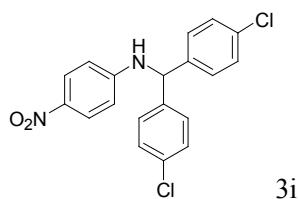

The physical data shown below were comparable to those reported in literature. <sup>[1]</sup>

Yellow solid, m.p. 194-195 °C, reported m.p. 193-195 °C. <sup>1</sup>H NMR (400 MHz, CDCl<sub>3</sub>) δ: 8.05 (m, 2H), 7.75-7.22 (m, 8H), 6.49 (d, *J* = 8.6 Hz, 2H). <sup>13</sup>C NMR (100 MHz, CDCl<sub>3</sub>) δ: 150.8, 137.8, 133.3, 128.7, 127.6, 125.0, 111.3, 60.0.

### N-(bis(4-methoxyphenyl)methyl)-4-nitrobenzenamine(3j)

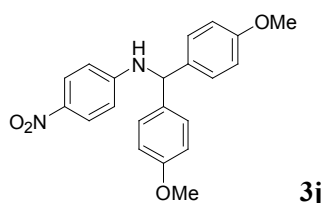

Yellow solid, m.p. 148-149 °C, <sup>1</sup>H NMR (400 MHz, CDCl<sub>3</sub>) δ: 8.04-6.48 (m, 12H), 5.54 (d, *J* = 4.8 Hz, 1H), 6.48 (d, *J* = 4.4 Hz, 1H), <sup>13</sup>C NMR (CDCl<sub>3</sub>, 100 MHz) δ: 159.1, 152.1, 133.3, 128.4, 126.2, 112.1, 114.3, 112.1, 61.1, 55.3. Element analysis C<sub>21</sub>H<sub>20</sub>N<sub>2</sub>O<sub>4</sub> (C<sub>21</sub>H<sub>20</sub>N<sub>2</sub>O<sub>4</sub>): calculated C, 69.22; H, 5.53; N, 7.69; found C, 69.08; H, 5.66; N, 7.57. HRMS (ESI): calculated 387.1321 for C<sub>21</sub>H<sub>20</sub>N<sub>2</sub>O<sub>4</sub> Na<sup>+</sup>, found 387.1311 (M+Na<sup>+</sup>).

### 4-methyl-N-(1-phenylethyl)benzenesulfonamide(3k)

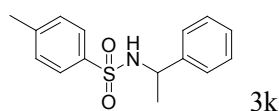

White solid, m.p. 81-82 °C, <sup>1</sup>H NMR (400 MHz, CDCl<sub>3</sub>) δ: 7.63-7.09 (m, 9H), 4.77 (d, *J* = 6.8 Hz, 1H), 4.46 (m, 1H), 2.39 (s, 3H), 1.43 (d, *J* = 6.8 Hz, 3H), <sup>13</sup>C NMR (CDCl<sub>3</sub>, 100 MHz) δ: 143.1, 142.0, 137.5, 129.4, 128.5, 127.1, 126.1, 53.6, 23.6, 21.5.

Element analysis (C<sub>15</sub>H<sub>17</sub>NO<sub>2</sub>S): calculated C, 65.43; H, 6.22; N, 5.09; found C, 65.39; H, 6.24; N, 5.06. HRMS (ESI): calculated 298.0878 for C<sub>15</sub>H<sub>17</sub>NO<sub>2</sub>S Na<sup>+</sup>, found 298.0871 (M+Na<sup>+</sup>).

**N-(1-(4-chlorophenyl)ethyl)-4-methylbenzenesulfonamide(3l)**

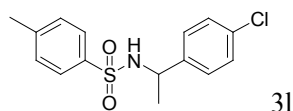

White solid, m.p. 138-139 °C, <sup>1</sup>H NMR (400 MHz, CDCl<sub>3</sub>) δ: 7.59-7.029 (m, 8H), 4.84 (d, *J* = 6.8 Hz, 1H), 4.45 (m, 1H), 2.40 (s, 3H), 1.39 (d, *J* = 6.8 Hz, 3H), <sup>13</sup>C NMR (CDCl<sub>3</sub>, 100 MHz) δ: 143.4, 142.0, 137.4, 133.2, 129.5, 128.6, 127.6, 127.0, 53.0, 23.5, 21.5. Element analysis (C<sub>15</sub>H<sub>16</sub>ClNO<sub>2</sub>S): calculated C, 58.15; H, 5.21; N, 4.52; found C, 58.11; H, 5.25; N, 4.50. HRMS (ESI): calculated 332.0488 for C<sub>15</sub>H<sub>16</sub>ClNO<sub>2</sub>S Na<sup>+</sup>, found 332.0490 (M+Na<sup>+</sup>)

**N-(1-(4-methoxyphenyl)ethyl)-4-methylbenzenesulfonamide(3m)**

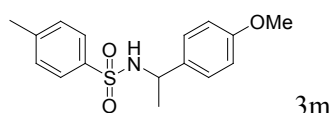

White solid, m.p. 96-98 °C, <sup>1</sup>H NMR (400 MHz, CDCl<sub>3</sub>) δ: 7.63-6.72 (m, 8H), 4.69 (d, *J* = 6.4 Hz, 1H), 4.41 (m, 1H), 3.76 (s, 3H), 2.40 (s, 3H), 3.76 (s, 3H), 1.41 (d, *J* = 6.8 Hz, 3H), <sup>13</sup>C NMR (CDCl<sub>3</sub>, 100 MHz) δ: 158.9, 143.1, 137.6, 134.1, 129.4, 127.3, 127.1, 113.8, 55.3, 53.1, 23.4, 21.5. Element analysis (C<sub>16</sub>H<sub>19</sub>NO<sub>3</sub>S): calculated C, 62.93; H, 6.27; N, 4.59; found C, 62.86; H, 6.30; N, 4.56. HRMS (ESI): calculated 328.0983 for C<sub>16</sub>H<sub>19</sub>NO<sub>3</sub>S Na<sup>+</sup>, found 328.0991 (M+Na<sup>+</sup>)

**N-(1,3-Diphenyl-allyl)-4-methyl-benzenesulfonamide (3n).**

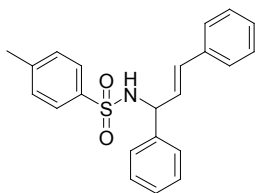

The physical data shown below were comparable to those reported in literature. <sup>[1]</sup>

White solid, m.p. 166-167 °C, reported m.p. 167-168 °C; <sup>1</sup>H NMR (400 MHz, CDCl<sub>3</sub>) δ: 7.69-7.66 (m, 2 H), 7.30-7.07 (m, 16 H (including the H of chloroform)), 6.39 (d, *J* = 16 Hz), 6.12 (dd, *J*<sub>1</sub> = 16 Hz, *J*<sub>2</sub> = 6.8 Hz), 5.15-5.12 (m, 1 H), 4.83 (d, *J* = 7.2 Hz), 2.41 (s, 3 H). <sup>13</sup>C NMR (100 MHz, CDCl<sub>3</sub>) δ: 137.5, 133.9, 131.8, 130.2, 126.7, 124.0, 123.3, 122.9, 122.6, 122.1, 122.0, 121.8, 121.3, 120.7, 53.8, 16.1.

2-((2,2-dimethylbenzo[d][1,3]dioxol-5-yl)methyl)-1-phenylbutane-1,3-dione (3o)

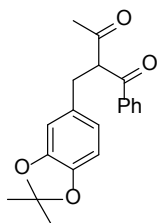

White oil, <sup>1</sup>H NMR (400 MHz, CDCl<sub>3</sub>) δ 7.94 (d, *J* = 7.8 Hz, 2H), 7.58 (d, *J* = 7.3 Hz, 1H), 7.47 (t, *J* = 7.4 Hz, 2H), 6.67 (dd, *J* = 16.0, 7.1 Hz, 3H), 5.90 (s, 2H), 4.75 (t, *J* = 7.1 Hz, 1H), 3.31 – 3.17 (m, 2H), 2.14 (s, 3H). <sup>13</sup>C NMR (101 MHz, CDCl<sub>3</sub>) δ 203.28, 195.72, 147.73, 146.28, 136.41, 133.78, 132.04, 128.89, 128.73, 121.83, 109.24, 108.37, 100.93, 65.11, 34.53, 28.62. Element analysis (C<sub>20</sub>H<sub>20</sub>O<sub>4</sub>): calculated C, 74.06; H, 6.21; found C, 74.03; H, 6.22. HRMS (ESI): calculated 347.1254 for C<sub>20</sub>H<sub>20</sub>O<sub>4</sub>Na<sup>+</sup>, found 347.1257 (M+Na<sup>+</sup>)

## References

[1] A. L. Zhu, L. J. Li, J. J. Wang, K. L. Zhuo, *Green Chem.*, 2011, **13**, 1244.

[2] K. Motokura, N. Nakagiri, T. Mizugaki, K. Ebitani and K. Kaneda, *J. Org. Chem.*, 2007, **72**, 6006.

[3] R. Sanz, D. Miguel, A. Martí'nez, J. M. Álvarez-Gutiérrez, F. Rodríguez. *Org. Lett.*, 2007, **9**, 2027.

[4] V. Terrasson, S. Marque, M. Georgy, J. M. Campagne, D. Prim, *Adv. Synth. Catal.* 2006, **348**, 2063.

[5] T. Maki, K. Ishihara, H. Yamamoto, *Org. Lett.*, 2006, **8**, 1431.



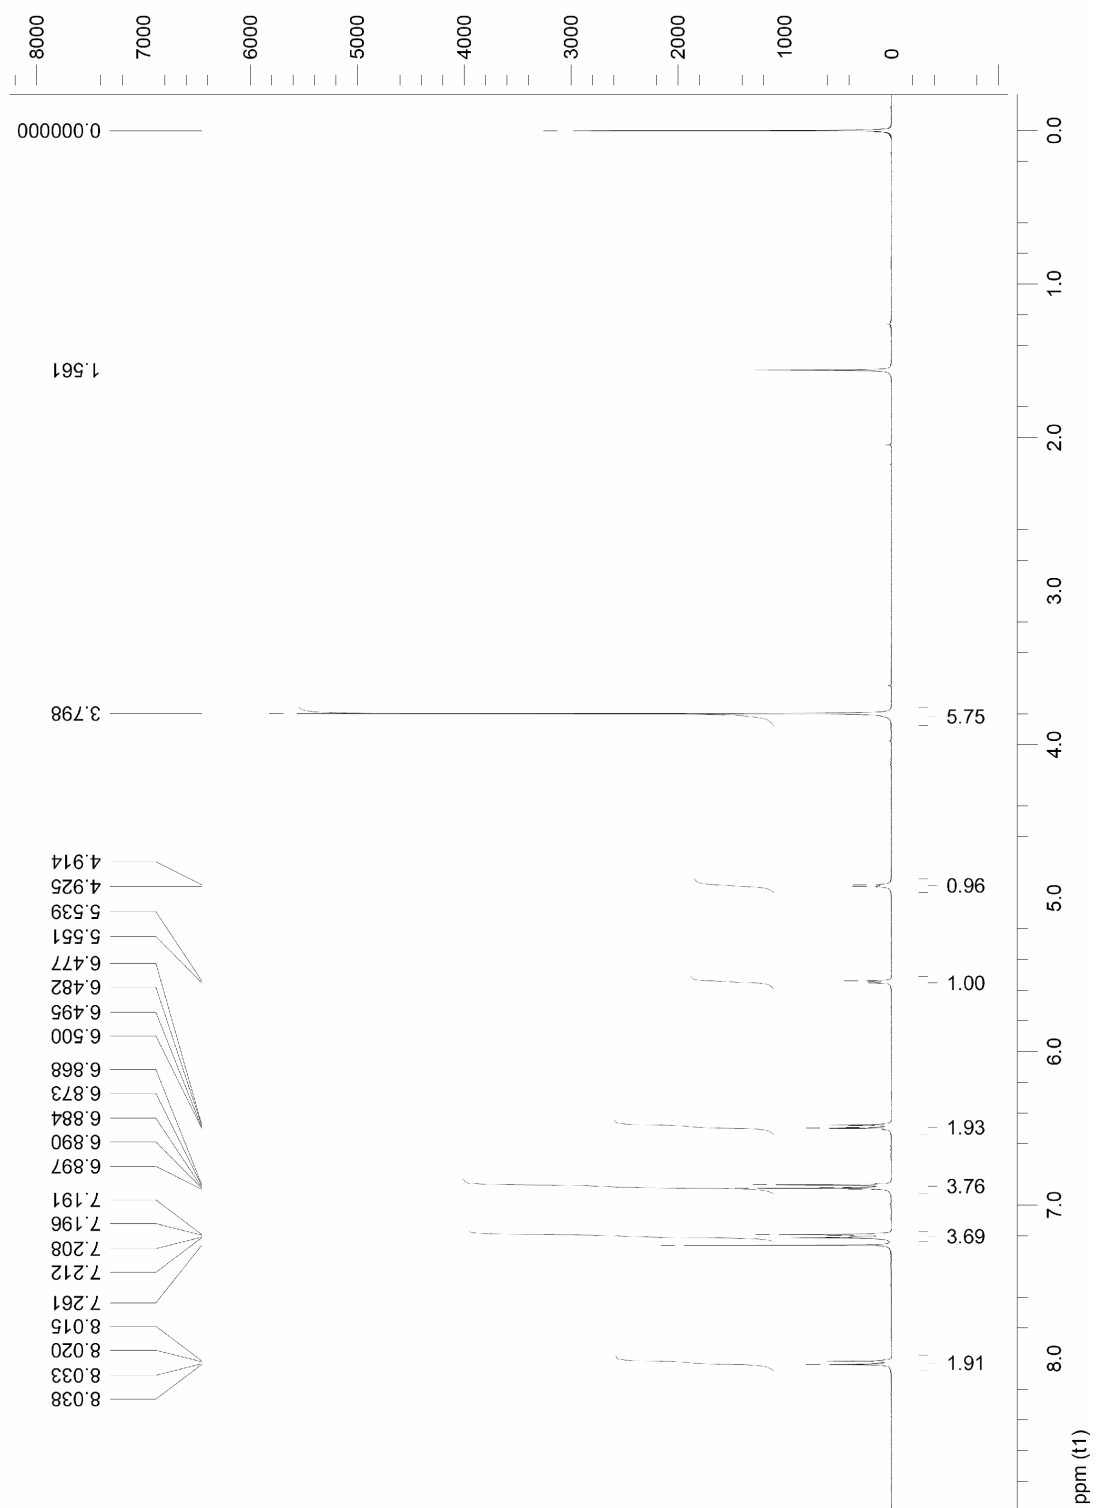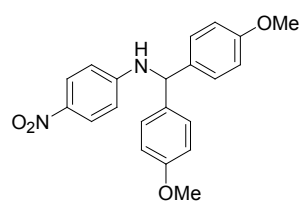

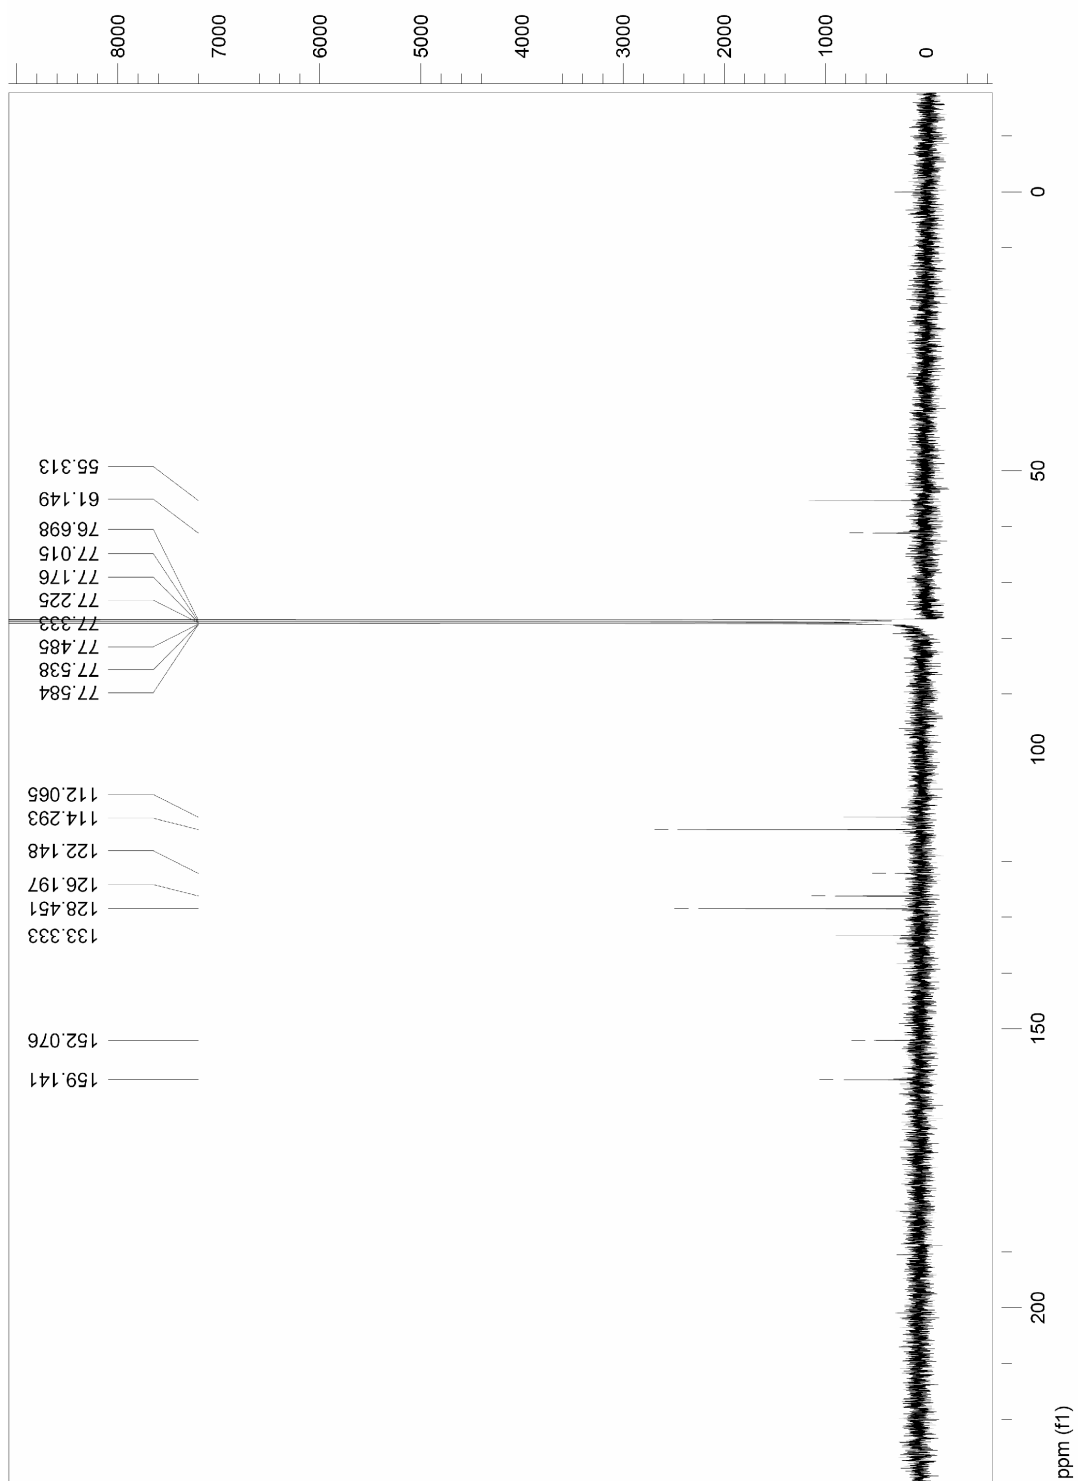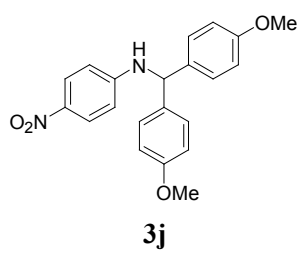

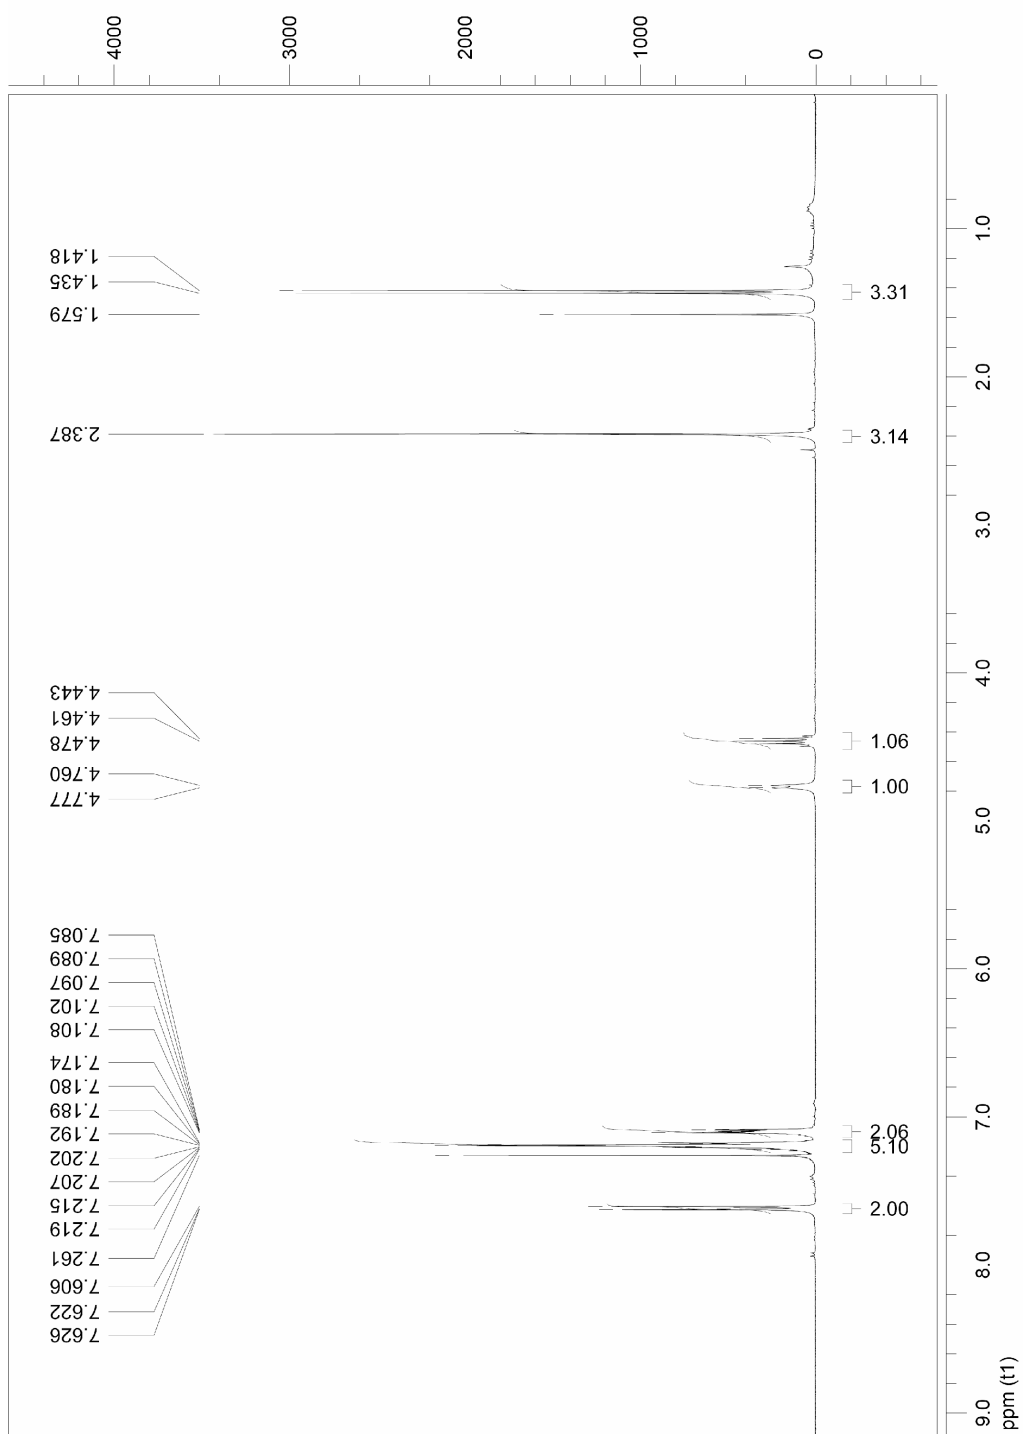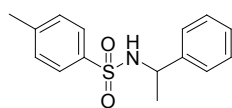

**3k**

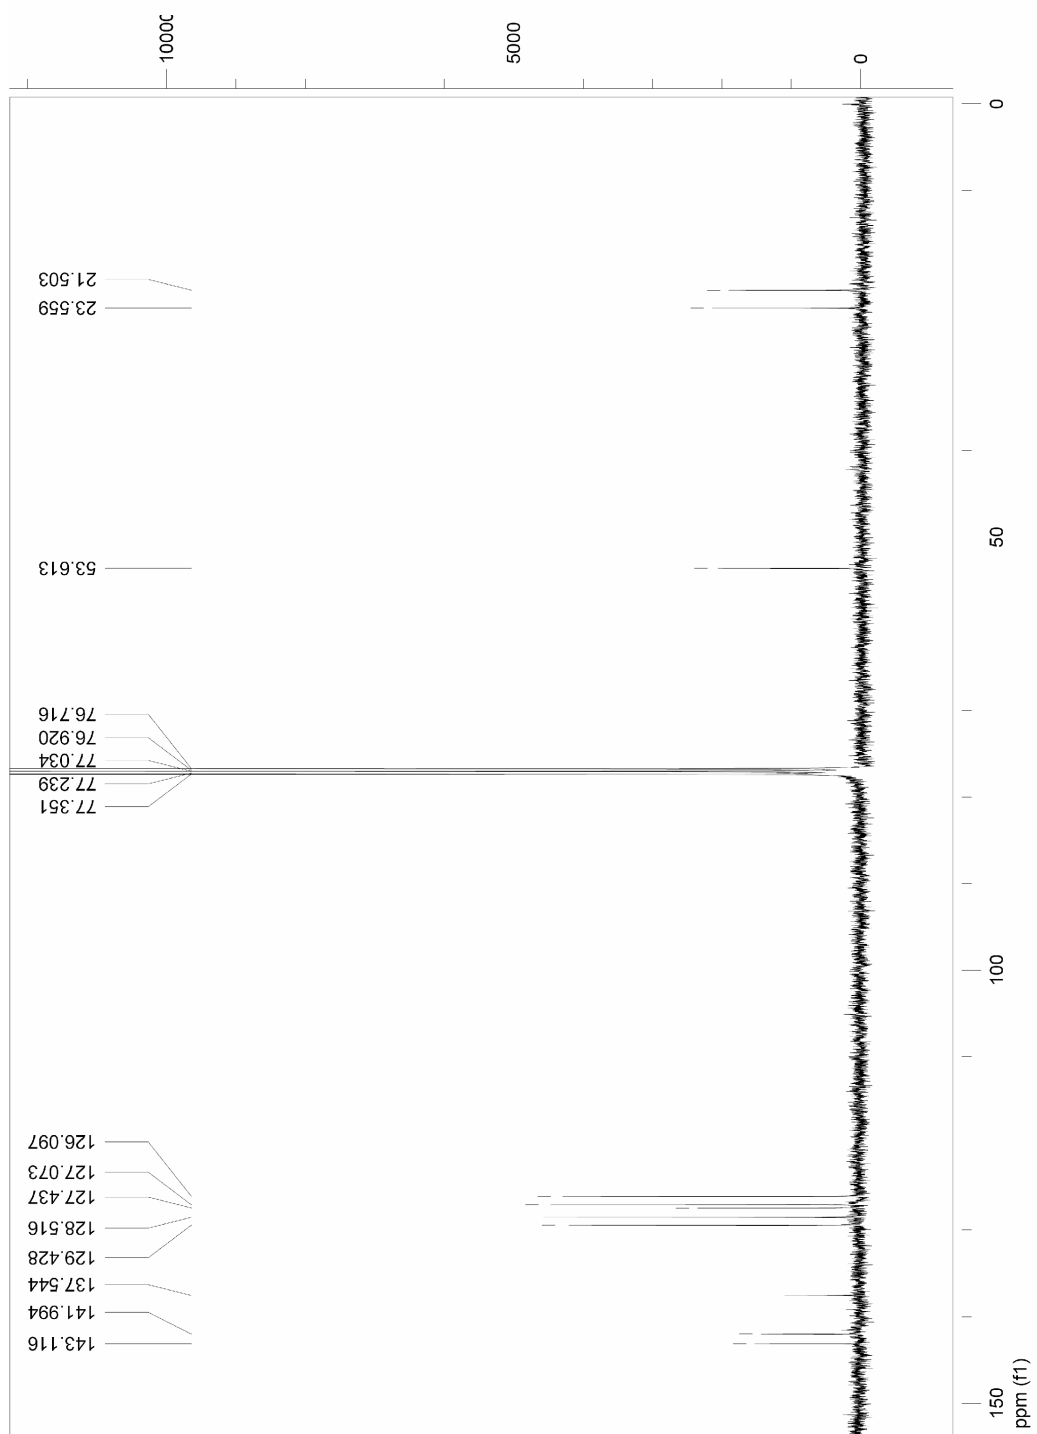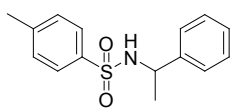

**3k**

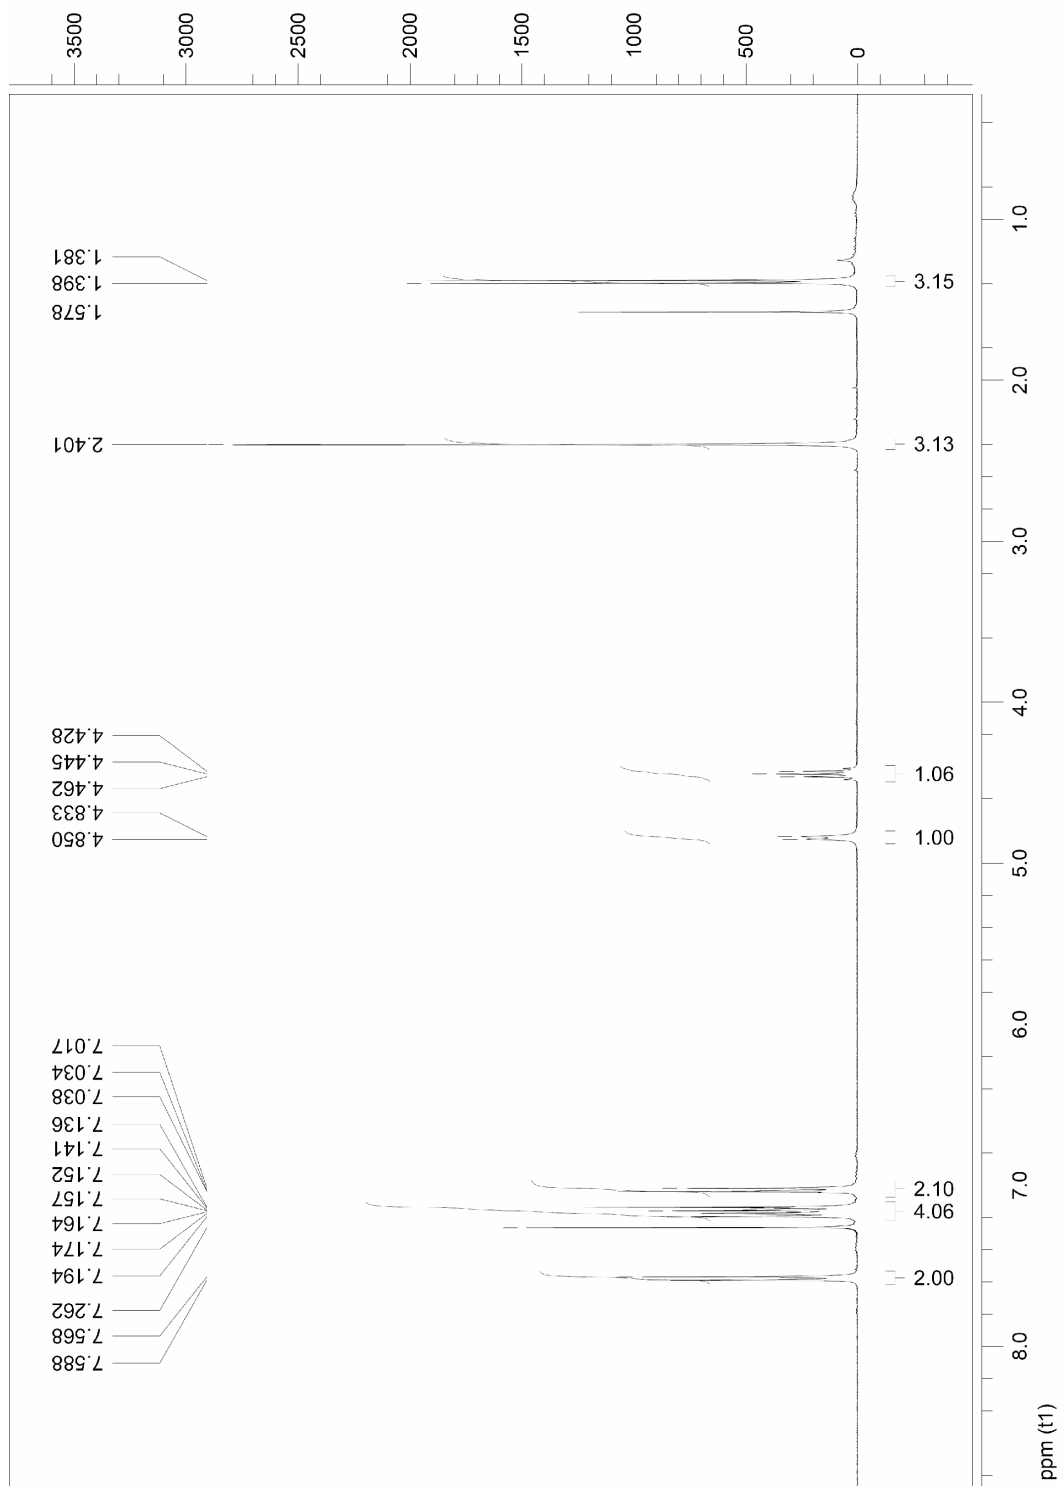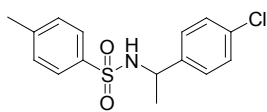

**3I**

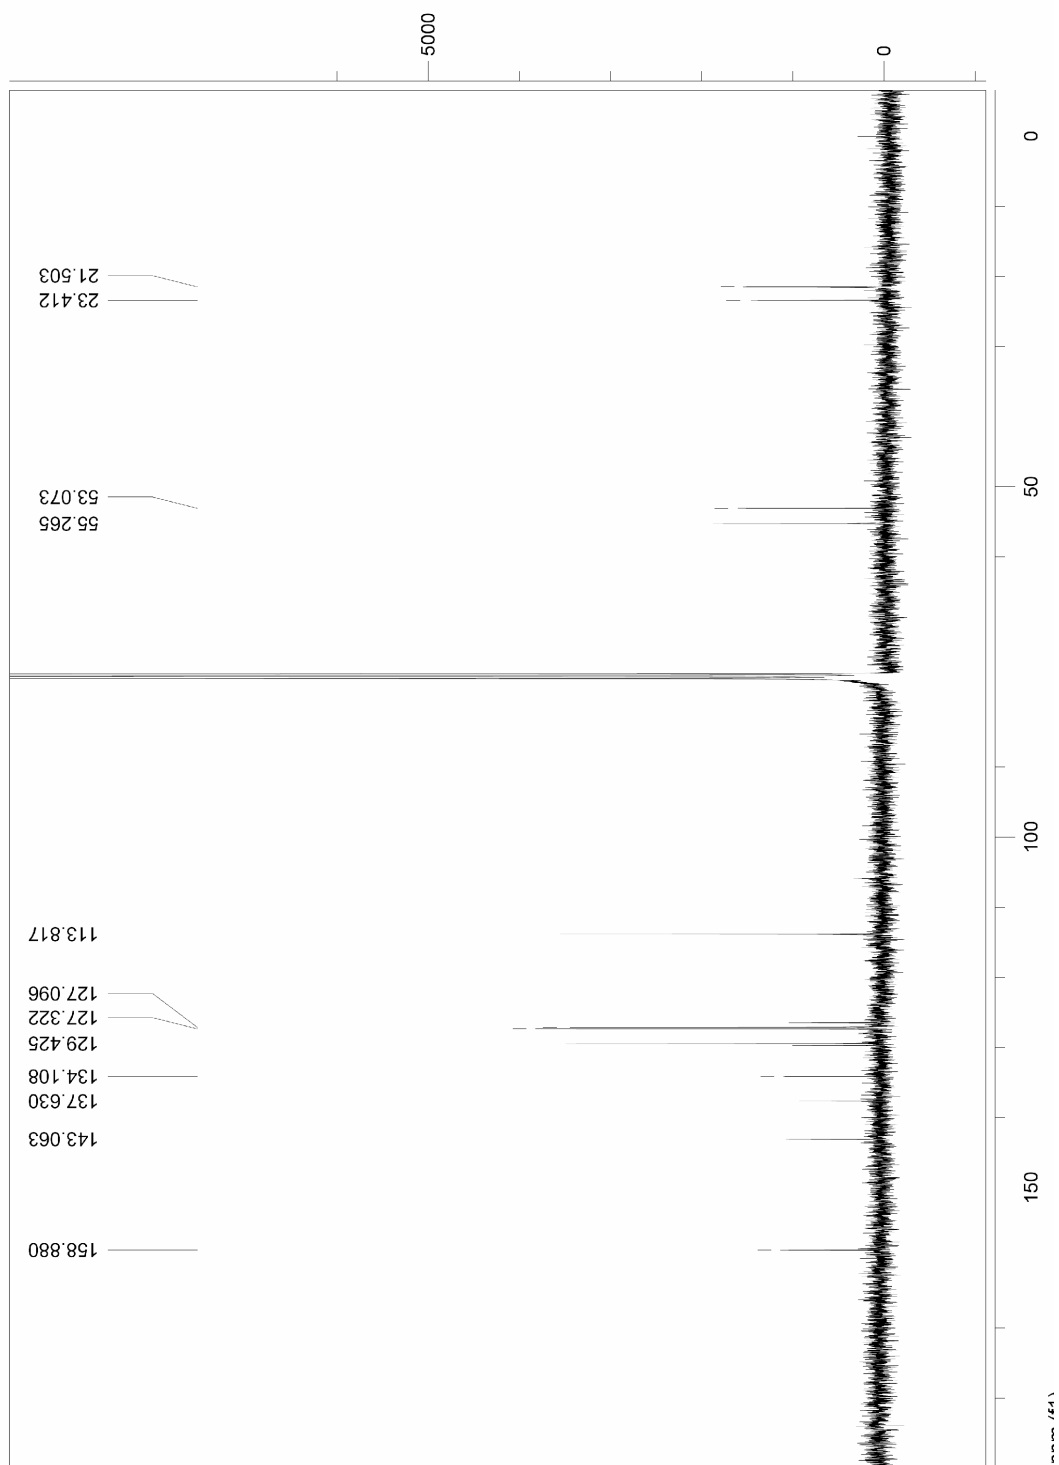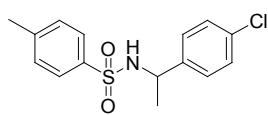

**3I**

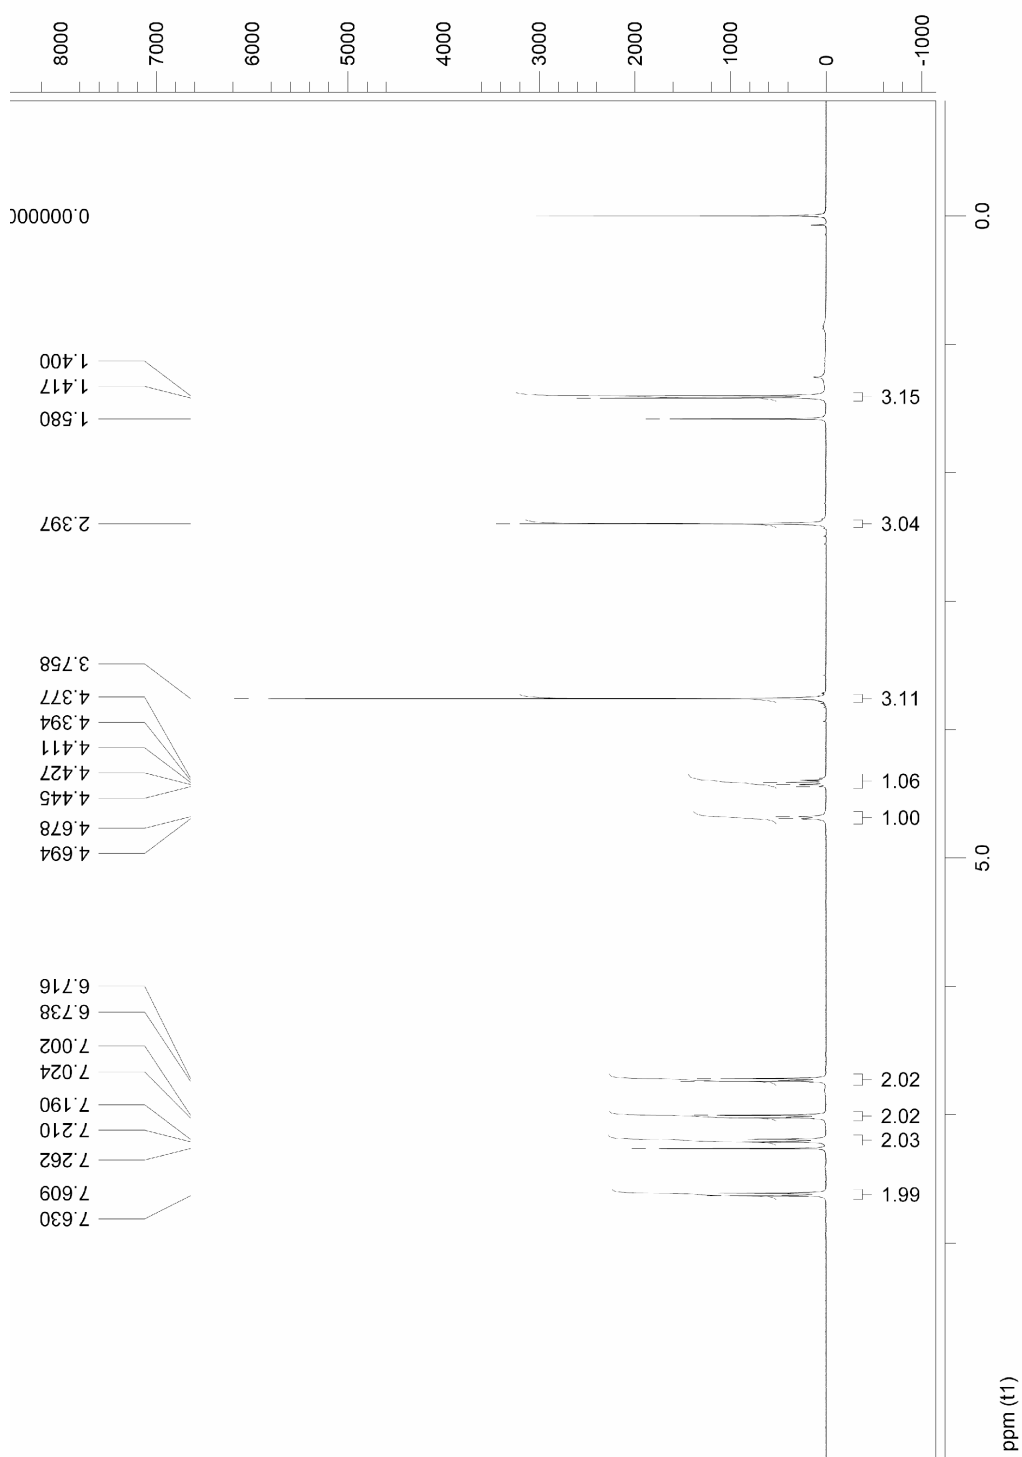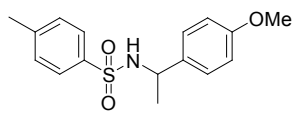

**3m**

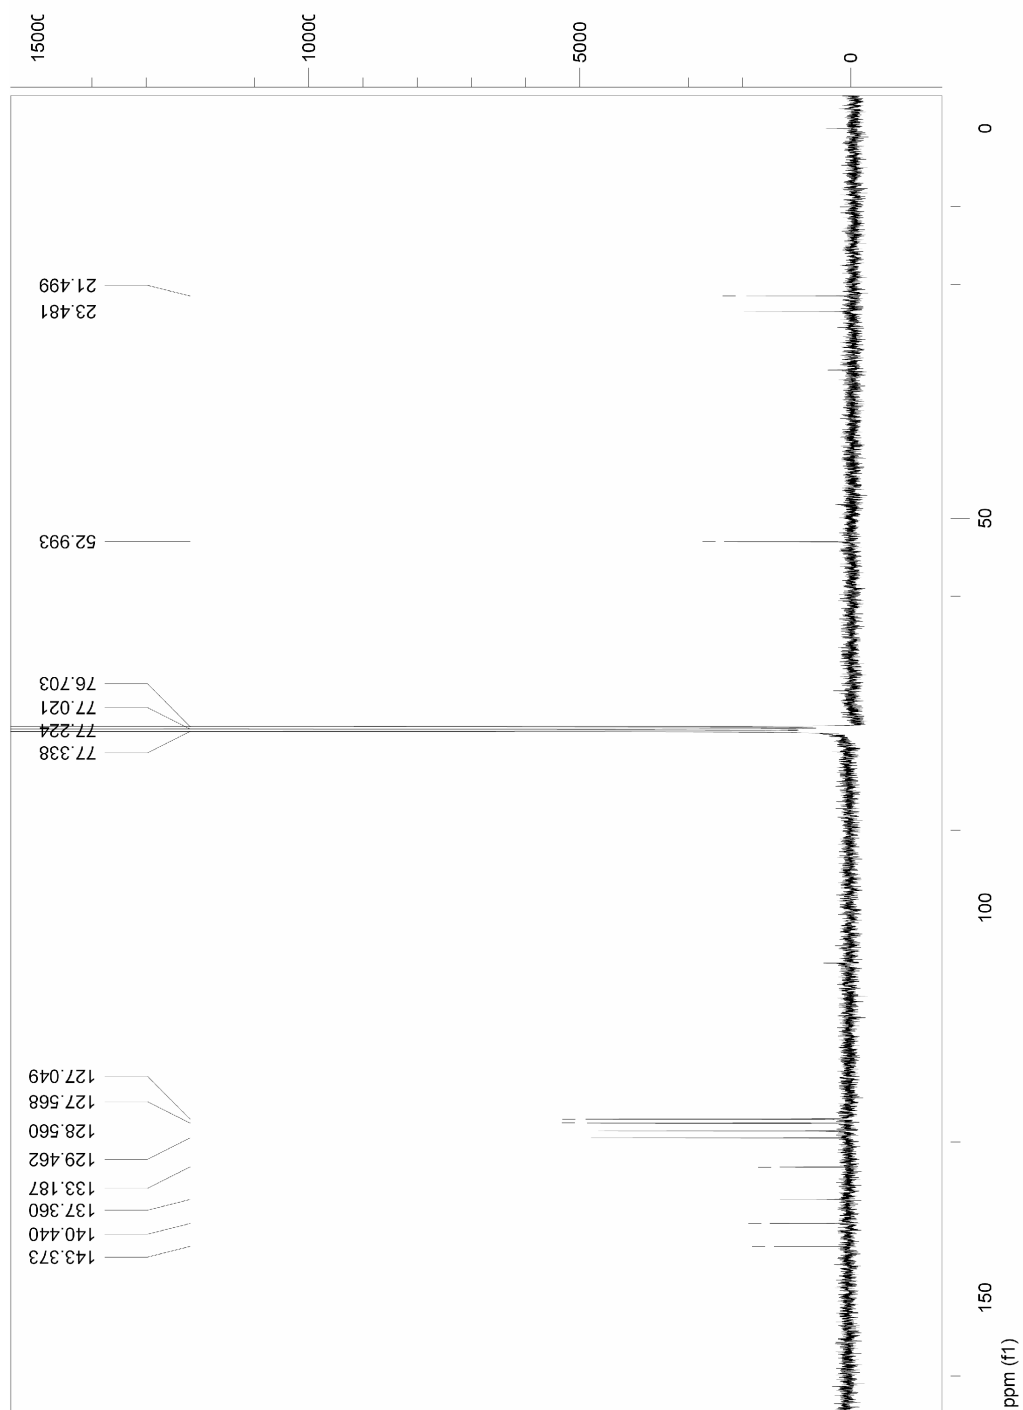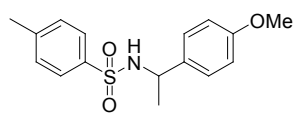

**3m**



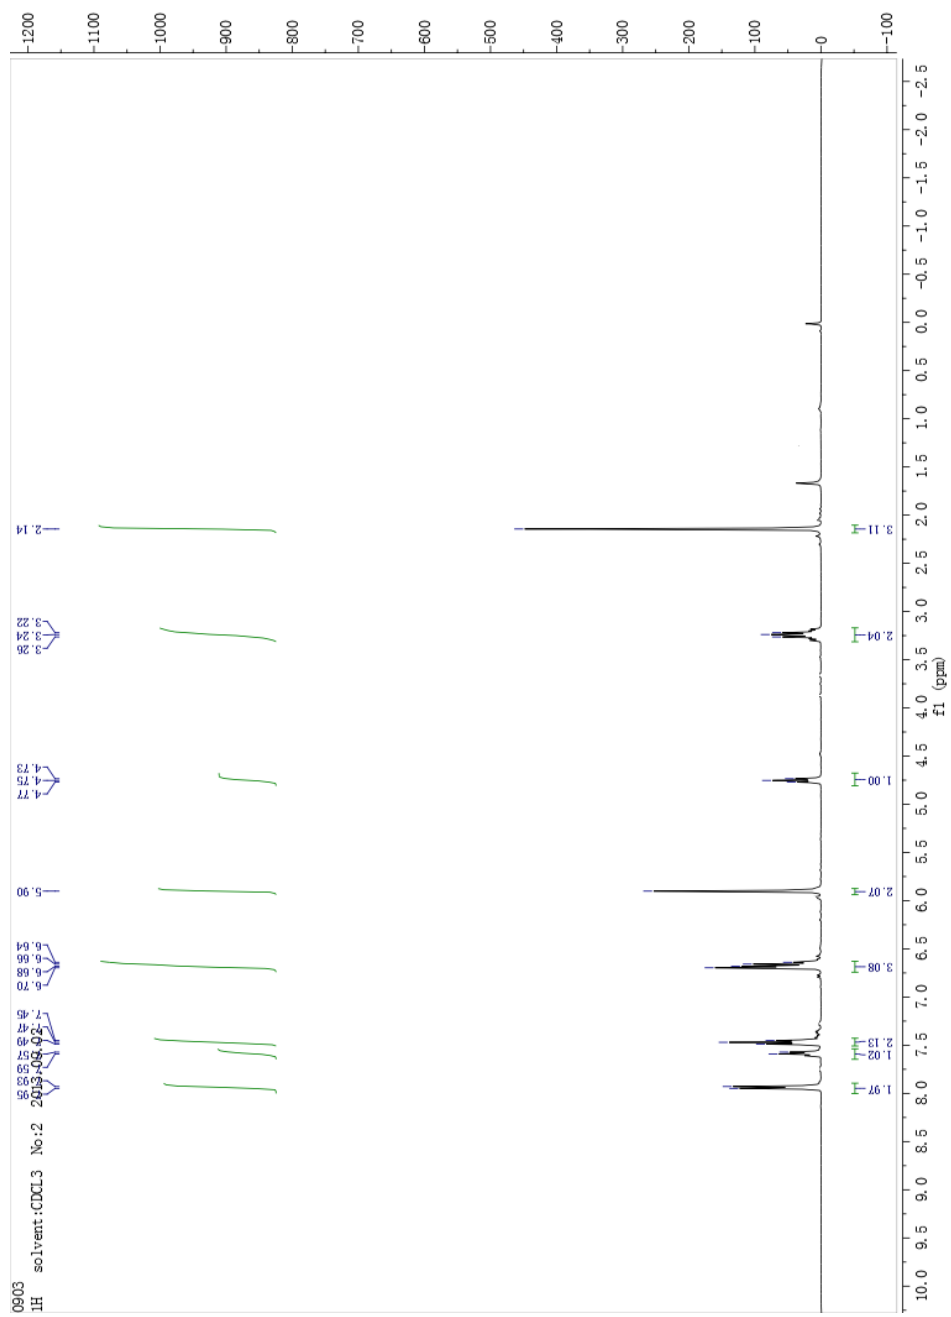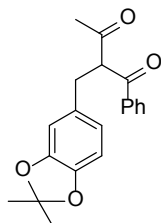

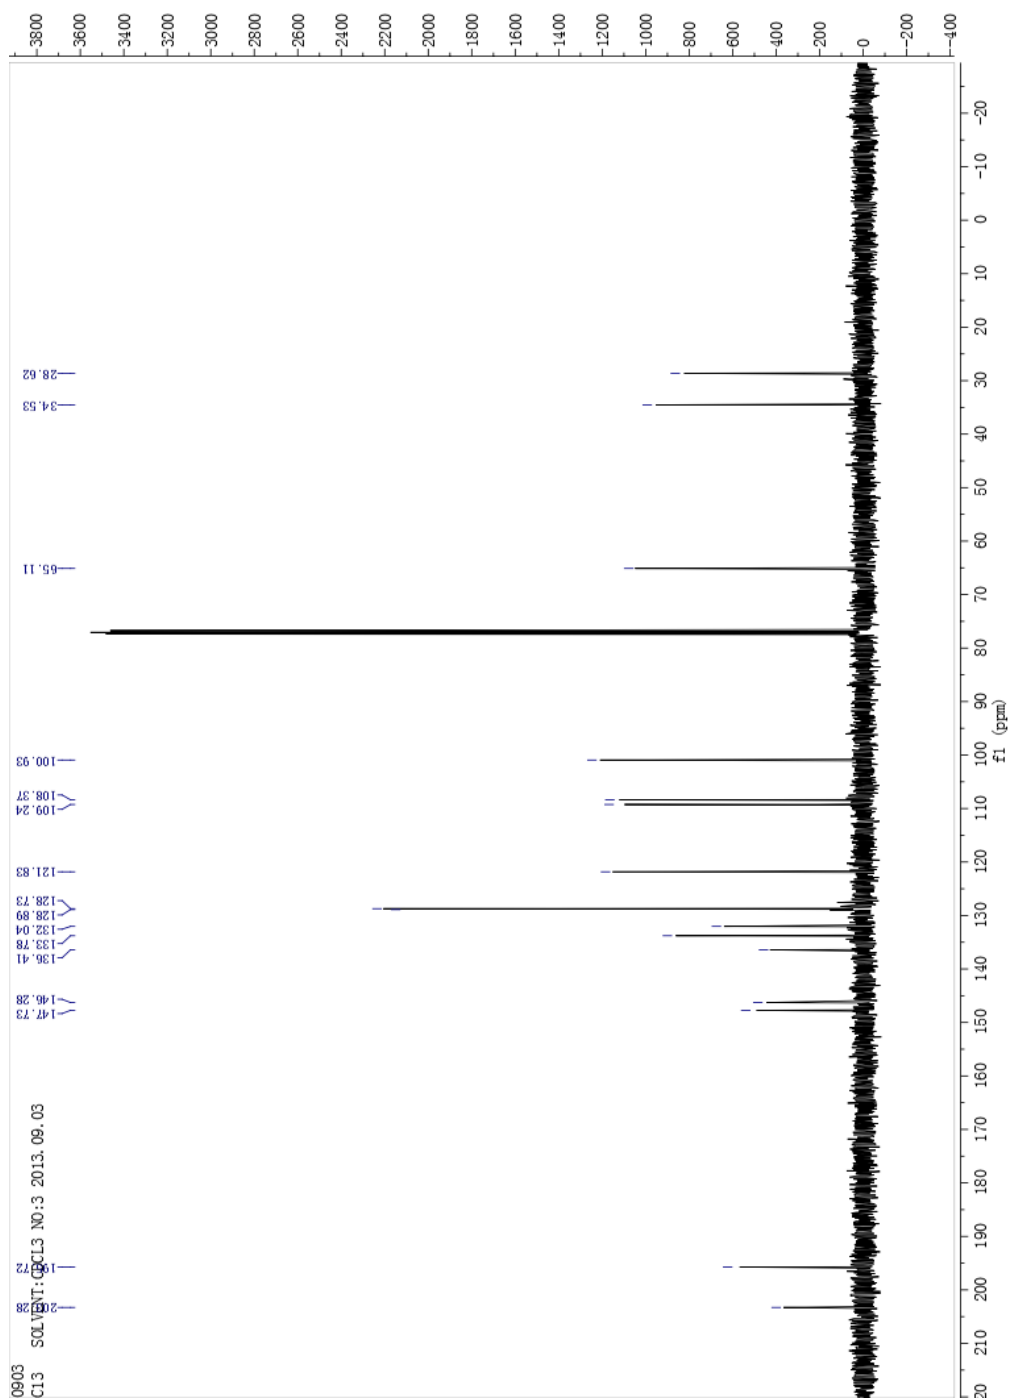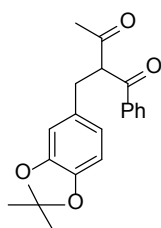

Supplement: c3ra45772a.pdf [file c3ra45772a.pdf]
